# Supplementary material for: Rees polycyanated hydrocarbons and related compounds are extremely powerful Brønsted superacids in the gas-phase and DMSO—a density functional B3LYP study
Source: Royal Society of Chemistry journal article supplement (doi:10.1039/b713173a), 2008-01-01
Supplement: b713173a.pdf [file b713173a.pdf]

Supplementary Material (ESI) for New Journal of Chemistry  
This journal is (c) The Royal Society of Chemistry and  
The Centre National de la Recherche Scientifique, 2007

## **SUPPORTING INFORMATION**

# **Rees polycyanated hydrocarbons and related compounds are extremely powerful Brønsted superacids in the gas-phase and DMSO – a density functional B3LYP study**

Robert Vianello<sup>\*[a]</sup> and Zvonimir B. Maksić<sup>[a,b]</sup>

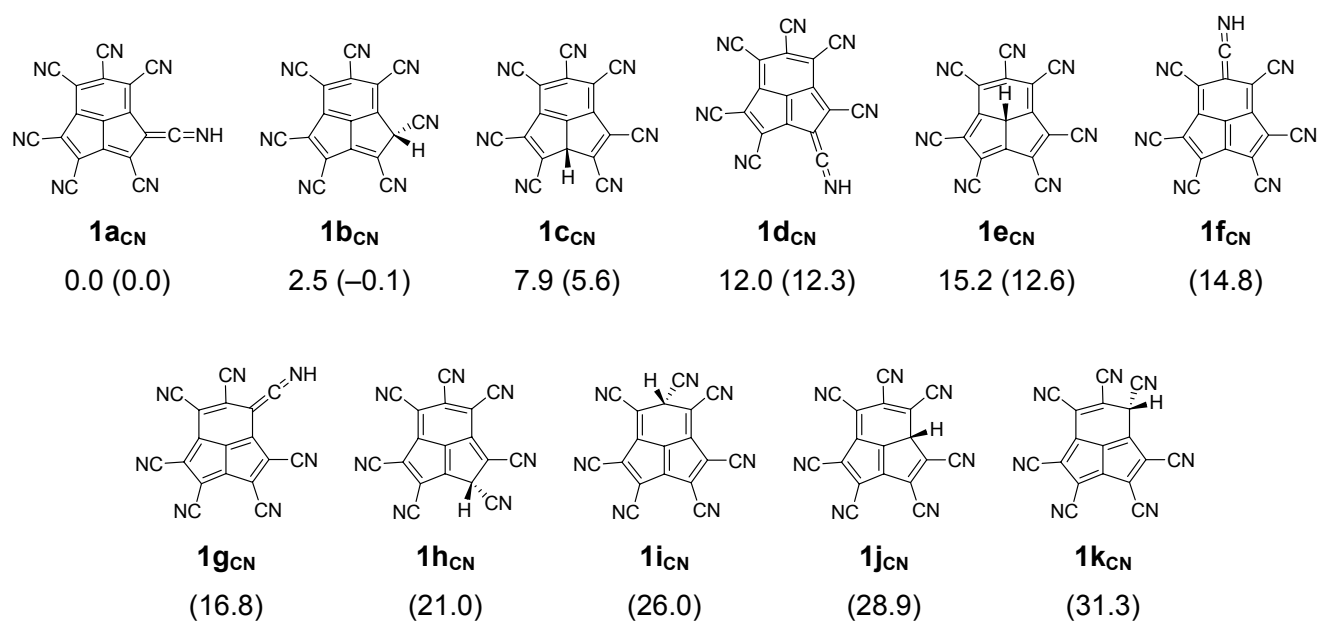

**Figure S1.** Schematic representation of heptacyano-7*b*H-cyclopenta[*cd*]indene tautomers and their relative energies obtained by the B3LYP/6-311+G(2d,p)//B3LYP/6-31G(d) and B3LYP/6-31G(d) models. The latter are given within parentheses (in kcal mol<sup>-1</sup>).

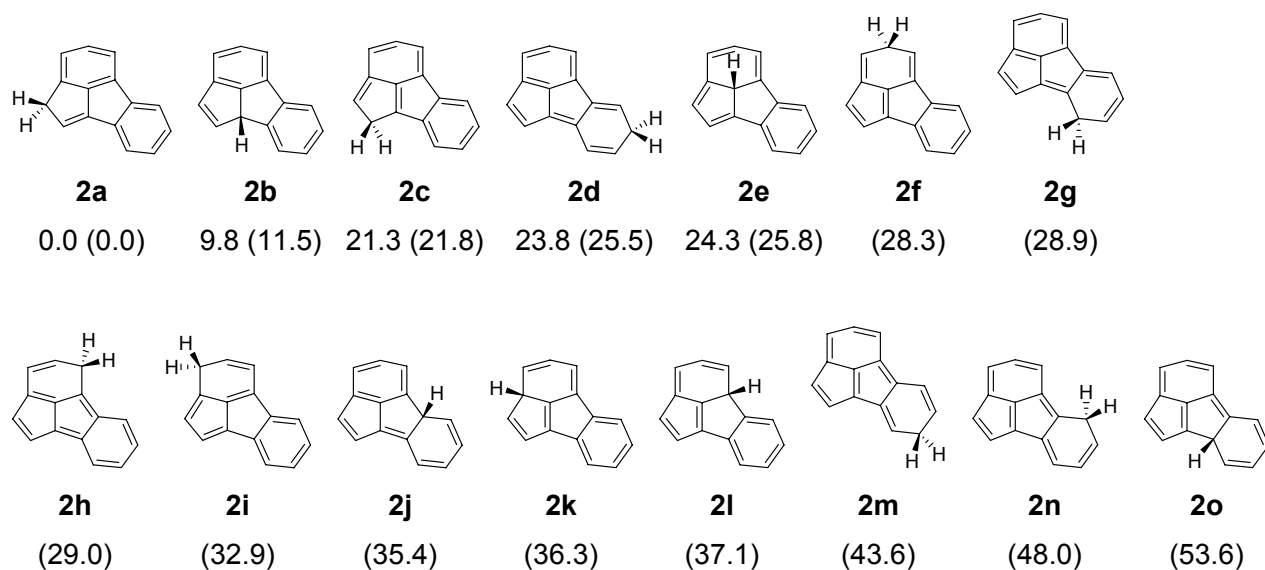

**Figure S2.** Schematic representation of 9cH-cyclopenta[jk]fluorene tautomers and their relative energies obtained by the B3LYP/6-311+G(2d,p)//B3LYP/6-31G(d) and B3LYP/6-31G(d) models. The latter are given within parentheses (in kcal mol<sup>-1</sup>).

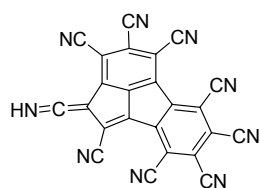

**2a<sub>CN</sub>**

0.0 (0.0)

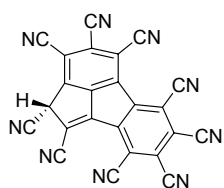

**2b<sub>CN</sub>**

3.4 (0.9)

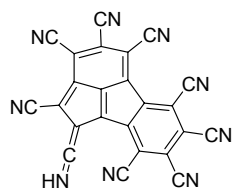

**2c<sub>CN</sub>**

7.8 (8.0)

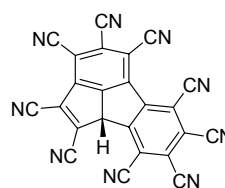

**2d<sub>CN</sub>**

8.8 (6.7)

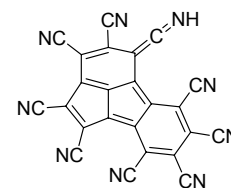

**2e<sub>CN</sub>**

11.3 (11.9)

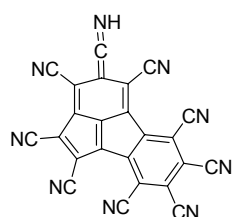

**2f<sub>CN</sub>**

12.8 (13.6)

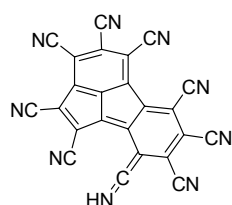

**2g<sub>CN</sub>**

13.2 (13.5)

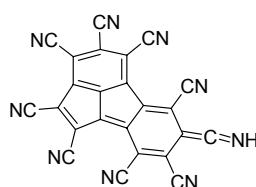

**2h<sub>CN</sub>**

13.8 (14.5)

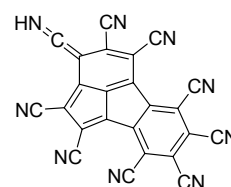

**2i<sub>CN</sub>**

16.0 (16.8)

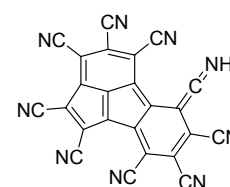

**2j<sub>CN</sub>**

17.6 (18.5)

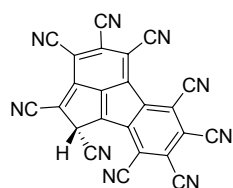

**2k<sub>CN</sub>**

20.7 (18.5)

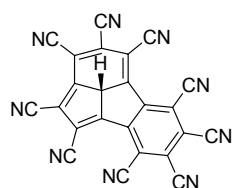

**2l<sub>CN</sub>**

22.4 (20.3)

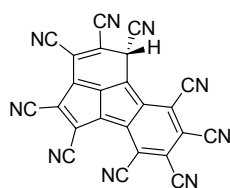

**2m<sub>CN</sub>**

(22.9)

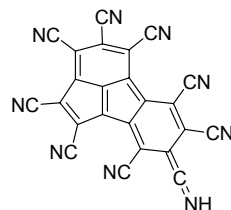

**2n<sub>CN</sub>**

(23.1)

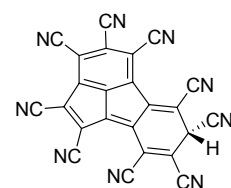

**2o<sub>CN</sub>**

(23.2)

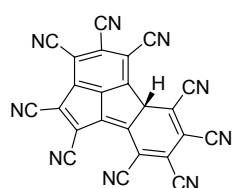

**2p<sub>CN</sub>**

(24.0)

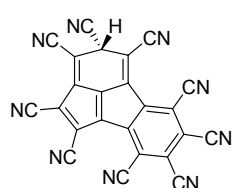

**2q<sub>CN</sub>**

(24.2)

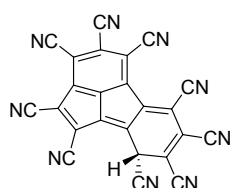

**2r<sub>CN</sub>**

(26.2)

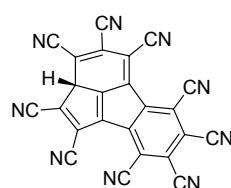

**2s<sub>CN</sub>**

(27.2)

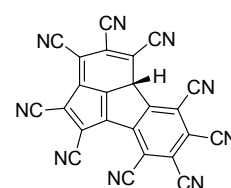

**2t<sub>CN</sub>**

(28.3)

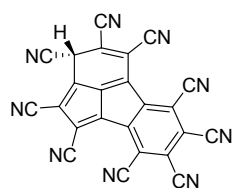

**2u<sub>CN</sub>**

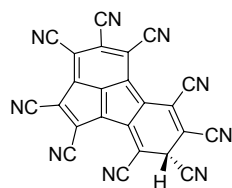

**2w<sub>CN</sub>**

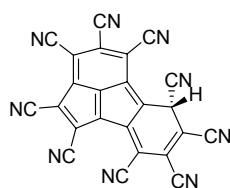

**2y<sub>CN</sub>**

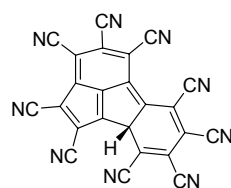

**2x<sub>CN</sub>**

Supplementary Material (ESI) for New Journal of Chemistry  
This journal is (c) The Royal Society of Chemistry and  
The Centre National de la Recherche Scientifique, 2007

(31.0)

(40.8)

(41.5)

(43.0)

**Figure S3.** Prototropic tautomerism in nonacyano-9*cH*-cyclopenta[*jk*]fluorene. The relative stabilities (in kcal mol<sup>-1</sup>) are calculated by the B3LYP/6-311+G(2d,p)//B3LYP/6-31G(d) (B3LYP/6-31G(d)) methods.

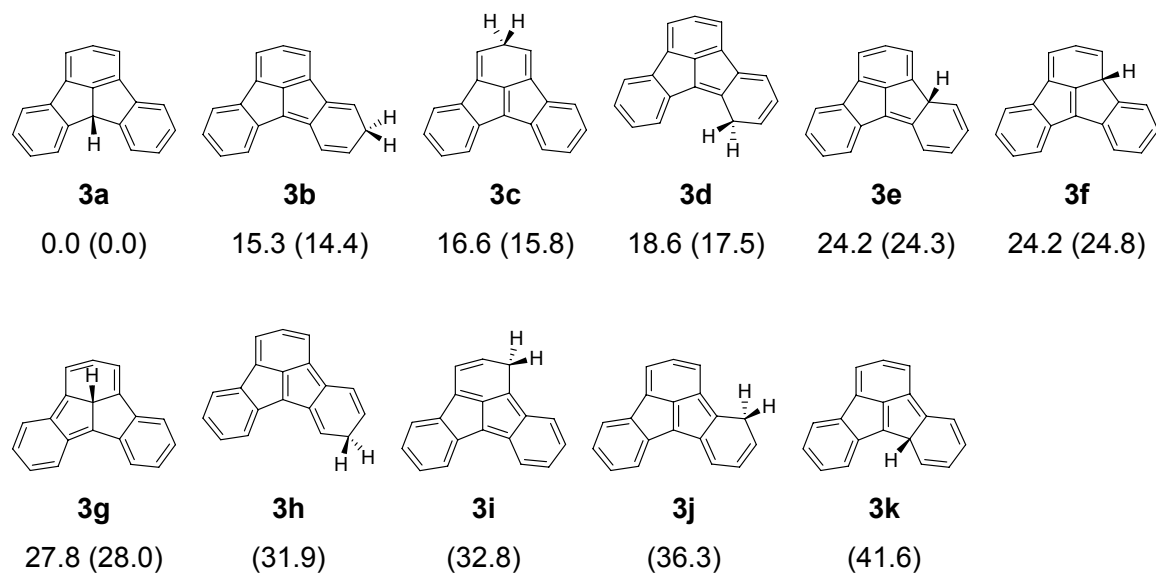

**Figure S4.** Schematic representation of fluoradene tautomers and their relative energies obtained by the B3LYP/6-311+G(2d,p)//B3LYP/6-31G(d) and B3LYP/6-31G(d) models. The latter are given within parentheses (in kcal mol<sup>-1</sup>).

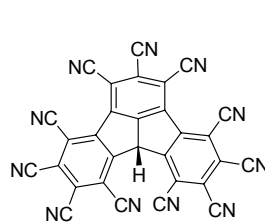

**3a<sub>CN</sub>**

0.0 (0.0)

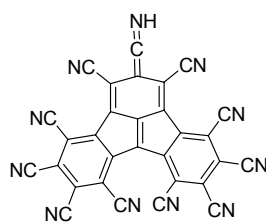

**3b<sub>CN</sub>**

2.7 (7.1)

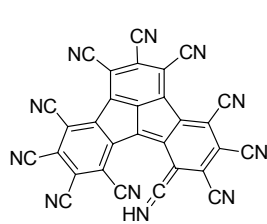

**3c<sub>CN</sub>**

3.1 (6.7)

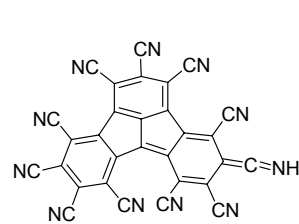

**3d<sub>CN</sub>**

3.5 (7.8)

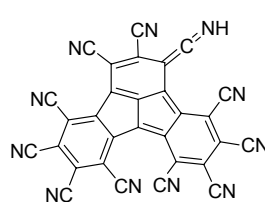

**3e<sub>CN</sub>**

6.4 (10.9)

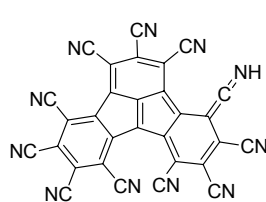

**3f<sub>CN</sub>**

8.7 (12.7)

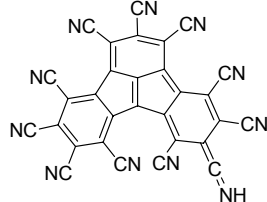

**3g<sub>CN</sub>**

10.8 (15.3)

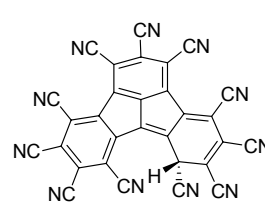

**3h<sub>CN</sub>**

12.1 (12.9)

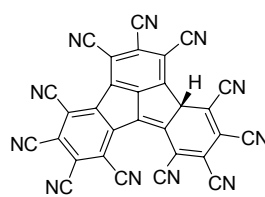

**3i<sub>CN</sub>**

14.3 (15.6)

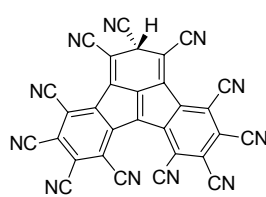

**3j<sub>CN</sub>**

14.3 (16.1)

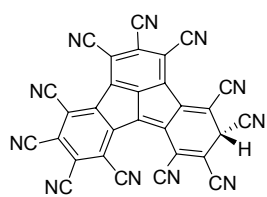

**3k<sub>CN</sub>**

14.9 (16.2)

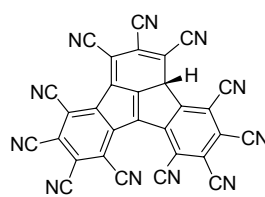

**3l<sub>CN</sub>**

18.0 (19.8)

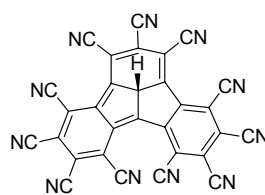

**3m<sub>CN</sub>**

25.4 (26.0)

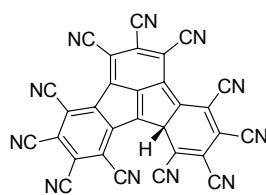

**3n<sub>CN</sub>**

(30.0)

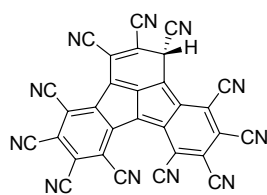

**3o<sub>CN</sub>**

(30.6)

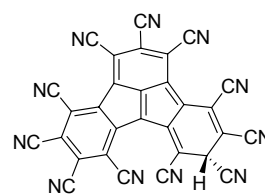

**3p<sub>CN</sub>**

(31.5)

Supplementary Material (ESI) for New Journal of Chemistry  
This journal is (c) The Royal Society of Chemistry and  
The Centre National de la Recherche Scientifique, 2007

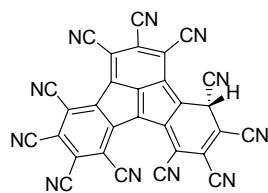

**3q<sub>CN</sub>**  
(33.1)

**Figure S5.** Prototropic tautomerism in undecacyano-fluoradene. The relative stabilities (in kcal mol<sup>-1</sup>) are calculated by the B3LYP/6-311+G(2d,p)//B3LYP/6-31G(d) and (B3LYP/6-31G(d)) methods.



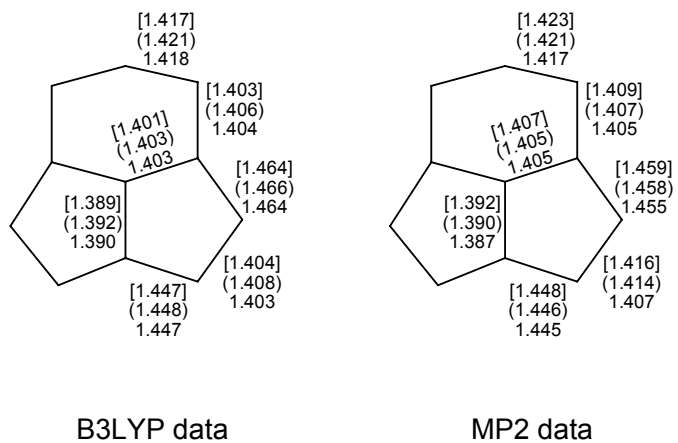

**Figure S6.** Relevant geometrical parameters of  $1^-$  obtained with B3LYP and MP2 methodologies employing 6-31G(d), (6-31+G(d)) and [6-311+G(d,p)] basis sets.

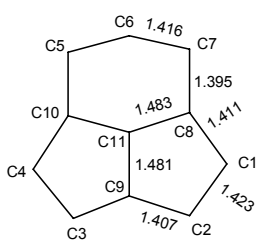

**1c**

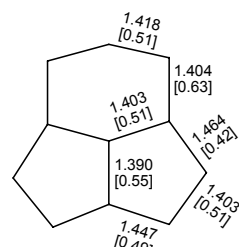

**1<sup>-</sup>**

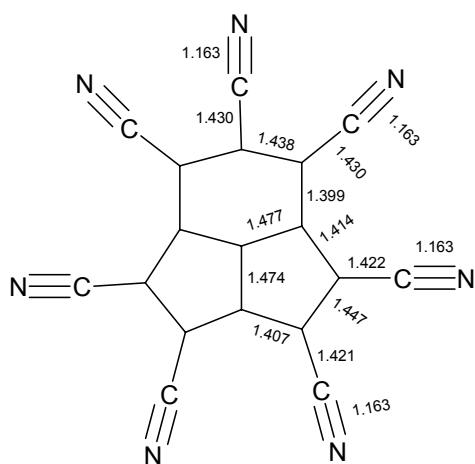

**1cCN**

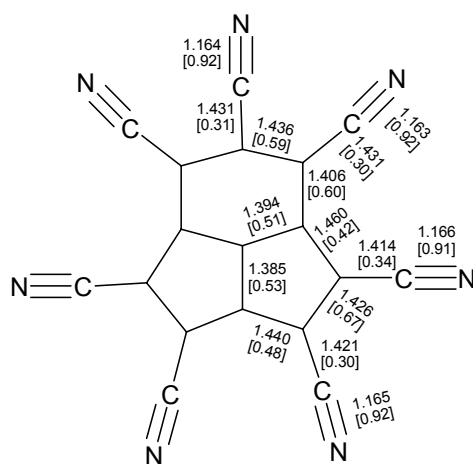

**1cN<sup>-</sup>**

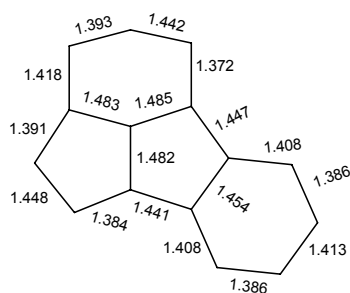

**2e**

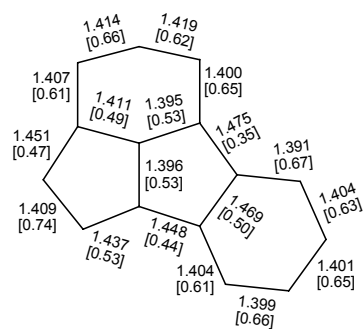

**2<sup>-</sup>**

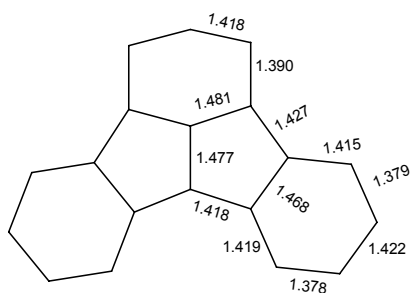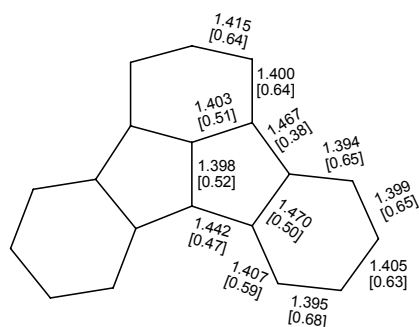

**3g**

**3<sup>-</sup>**

**Figure S7.** Schematic representation and numbering of atoms in **1c**, its heptacyano derivative **1e<sub>CN</sub>** and systems **2e** and **3g** as well as their anions **1<sup>-</sup>**, **1<sub>CN</sub><sup>-</sup>**, **2<sup>-</sup>** and **3<sup>-</sup>**. Characteristic bond lengths (in Å) are computed by the B3LYP/6–31G(d) model. Löwdin  $\pi$ -bond orders in the planar anions are given within the squared parentheses and are obtained by the HF/6–31G(d)//B3LYP/6–31G(d) approach.

| system     | HOMO                                                                                                              | HOMO-1                                                                                                             |
|------------|-------------------------------------------------------------------------------------------------------------------|--------------------------------------------------------------------------------------------------------------------|
| $1^-$      | <br>(-0.07833) <sub>1a</sub>     | <br>(-0.11290) <sub>1c</sub>     |
| $1_{CN}^-$ | <br>(-0.22620) <sub>1aCN</sub>   | <br>(-0.25832) <sub>1eCN</sub>   |
| $2^-$      | <br>(-0.08080) <sub>2a</sub>    | <br>(-0.12507) <sub>2e</sub>    |
| $2_{CN}^-$ | <br>(-0.22954) <sub>2aCN</sub> | <br>(-0.26478) <sub>2iCN</sub> |
| $3^-$      | <br>(-0.08077) <sub>3a</sub>   | <br>(-0.13916) <sub>3g</sub>   |
| $3_{CN}^-$ | <br>(-0.23078) <sub>3aCN</sub> | <br>(-0.28288) <sub>3mCN</sub> |

Supplementary Material (ESI) for New Journal of Chemistry  
This journal is (c) The Royal Society of Chemistry and  
The Centre National de la Recherche Scientifique, 2007

**Figure S8.** Selected molecular orbitals together with their orbital energies [HF/6-311+G(2d,p)//B3LYP/6-31G(d) results; in a.u.] for anions discussed in the text. PRIMO orbitals are given within round brackets with subscripts denoting corresponding neutral acid.



|                        |                                                                                   |                                                                                   |                                                                                    |                                                                                     |                                                                                     |                                                                                     |                        |                                   |                        |                                   |                        |                                   |
|------------------------|-----------------------------------------------------------------------------------|-----------------------------------------------------------------------------------|------------------------------------------------------------------------------------|-------------------------------------------------------------------------------------|-------------------------------------------------------------------------------------|-------------------------------------------------------------------------------------|------------------------|-----------------------------------|------------------------|-----------------------------------|------------------------|-----------------------------------|
| L(d) <sub>CC</sub> / % | 32.3                                                                              | 22.8                                                                              |                                                                                    |                                                                                     |                                                                                     |                                                                                     |                        |                                   |                        |                                   |                        |                                   |
| NICS(1)                |                                                                                   |                                                                                   |                                                                                    |                                                                                     |                                                                                     |                                                                                     | -14.0                  | -13.4                             | -11.1                  |                                   | -8.9                   | -5.5                              |
| NICS(1) <sub>zz</sub>  |                                                                                   |                                                                                   |                                                                                    |                                                                                     |                                                                                     |                                                                                     | -30.3                  | -28.1                             | -21.4                  |                                   | -14.1                  | -3.2                              |
|                        | 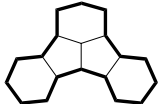 |  |  |  |  |  |                        |                                   |                        |                                   |                        |                                   |
| <b>system</b>          | <b>3a</b>                                                                         | <b>3<sup>-</sup></b>                                                              | <b>3a</b>                                                                          | <b>3<sup>-</sup></b>                                                                | <b>3a</b>                                                                           | <b>3<sup>-</sup></b>                                                                | <b>3a</b>              | <b>3<sup>-</sup></b>              | <b>3a</b>              | <b>3<sup>-</sup></b>              | <b>3a</b>              | <b>3<sup>-</sup></b>              |
| HOMA                   | (0.818) <sub>18</sub>                                                             | (0.688) <sub>18</sub>                                                             | (0.704) <sub>14</sub>                                                              | (0.491) <sub>14</sub>                                                               | (0.499) <sub>10</sub>                                                               | (0.136) <sub>10</sub>                                                               | (0.179) <sub>6</sub>   | (0.906) <sub>6</sub>              | (0.595) <sub>6</sub>   | (0.674) <sub>6</sub>              | (-0.309) <sub>5</sub>  | (0.165) <sub>5</sub>              |
| L(d) <sub>CC</sub>     | 0.033                                                                             | 0.037                                                                             |                                                                                    |                                                                                     |                                                                                     |                                                                                     |                        |                                   |                        |                                   |                        |                                   |
| L(d) <sub>CC</sub> / % | 23.9                                                                              | 26.2                                                                              |                                                                                    |                                                                                     |                                                                                     |                                                                                     |                        |                                   |                        |                                   |                        |                                   |
| NICS(1)                |                                                                                   |                                                                                   |                                                                                    |                                                                                     |                                                                                     |                                                                                     |                        | -14.4                             | -11.5                  | -11.4                             |                        | -7.8                              |
| NICS(1) <sub>zz</sub>  |                                                                                   |                                                                                   |                                                                                    |                                                                                     |                                                                                     |                                                                                     |                        | -35.4                             | -25.9                  | -26.9                             |                        | -12.4                             |
| <b>system</b>          | <b>3a<sub>CN</sub></b>                                                            | <b>3<sub>CN</sub><sup>-</sup></b>                                                 | <b>3a<sub>CN</sub></b>                                                             | <b>3<sub>CN</sub><sup>-</sup></b>                                                   | <b>3a<sub>CN</sub></b>                                                              | <b>3<sub>CN</sub><sup>-</sup></b>                                                   | <b>3a<sub>CN</sub></b> | <b>3<sub>CN</sub><sup>-</sup></b> | <b>3a<sub>CN</sub></b> | <b>3<sub>CN</sub><sup>-</sup></b> | <b>3a<sub>CN</sub></b> | <b>3<sub>CN</sub><sup>-</sup></b> |
| HOMA                   | (0.688) <sub>18</sub>                                                             | (0.598) <sub>18</sub>                                                             | (0.575) <sub>14</sub>                                                              | (0.428) <sub>14</sub>                                                               | (0.399) <sub>10</sub>                                                               | (0.121) <sub>10</sub>                                                               | (-0.016) <sub>6</sub>  | (0.768) <sub>6</sub>              | (0.432) <sub>6</sub>   | (0.607) <sub>6</sub>              | (-0.271) <sub>5</sub>  | (0.231) <sub>5</sub>              |
| L(d) <sub>CC</sub>     | 0.030                                                                             | 0.030                                                                             |                                                                                    |                                                                                     |                                                                                     |                                                                                     |                        |                                   |                        |                                   |                        |                                   |
| L(d) <sub>CC</sub> / % | 21.3                                                                              | 21.5                                                                              |                                                                                    |                                                                                     |                                                                                     |                                                                                     |                        |                                   |                        |                                   |                        |                                   |
| NICS(1)                |                                                                                   |                                                                                   |                                                                                    |                                                                                     |                                                                                     |                                                                                     |                        |                                   |                        |                                   |                        |                                   |
| NICS(1) <sub>zz</sub>  |                                                                                   |                                                                                   |                                                                                    |                                                                                     |                                                                                     |                                                                                     |                        |                                   |                        |                                   |                        |                                   |

<sup>a</sup> HOMA, L(d)<sub>CC</sub> and L(d)<sub>CC</sub> / % are obtained at B3LYP/6-31G(d) level of theory

<sup>b</sup> NICS(1) and NICS(1)<sub>zz</sub> are obtained at GIAO/HF/6-31G(d)//B3LYP/6-31G(d) level of theory

Supplementary Material (ESI) for New Journal of Chemistry  
This journal is (c) The Royal Society of Chemistry and  
The Centre National de la Recherche Scientifique, 2007



**Table S2.** Bond distances (in Å),<sup>a</sup> Löwdin  $\pi$ -bond orders (in |e|)<sup>b</sup> (in squared parentheses), Löwdin  $\pi$ -atomic charges (in |e|)<sup>b</sup>. Atom numbering is given below.

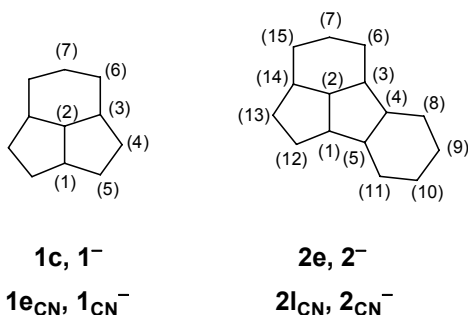

| bond/atom             | 1c              | 1 <sup>-</sup>  | 2e              | 2 <sup>-</sup>  | 1e <sub>CN</sub> | 1 <sub>CN</sub> <sup>-</sup> | 2l <sub>CN</sub> | 2 <sub>CN</sub> <sup>-</sup> |
|-----------------------|-----------------|-----------------|-----------------|-----------------|------------------|------------------------------|------------------|------------------------------|
| C1-C2                 | 1.481<br>[0.15] | 1.390<br>[0.55] | 1.482<br>[0.17] | 1.396<br>[0.53] | 1.474<br>[0.17]  | 1.385<br>[0.53]              | 1.483            | 1.395<br>[0.51]              |
| C1-C5                 | 1.407<br>[0.54] | 1.447<br>[0.49] | 1.441<br>[0.40] | 1.448<br>[0.44] | 1.407<br>[0.53]  | 1.440<br>[0.48]              | 1.438            | 1.436<br>[0.45]              |
| C1-C12                |                 |                 | 1.384<br>[0.62] | 1.437<br>[0.53] |                  |                              | 1.385            | 1.435<br>[0.53]              |
| C2-C3                 | 1.483<br>[0.13] | 1.403<br>[0.51] | 1.485<br>[0.15] | 1.395<br>[0.53] | 1.477<br>[0.13]  | 1.394<br>[0.51]              | 1.489            | 1.394<br>[0.53]              |
| C2-C14                |                 |                 | 1.483<br>[0.09] | 1.411<br>[0.49] |                  |                              | 1.475            | 1.403<br>[0.48]              |
| C3-C4                 | 1.411<br>[0.55] | 1.464<br>[0.42] | 1.447<br>[0.40] | 1.475<br>[0.35] | 1.414<br>[0.54]  | 1.460<br>[0.42]              | 1.452            | 1.481<br>[0.35]              |
| C3-C6                 | 1.395<br>[0.58] | 1.404<br>[0.63] | 1.372<br>[0.71] | 1.400<br>[0.65] | 1.399<br>[0.55]  | 1.406<br>[0.60]              | 1.378            | 1.411<br>[0.61]              |
| C4-C5                 | 1.423<br>[0.60] | 1.403<br>[0.51] | 1.454<br>[0.55] | 1.469<br>[0.50] | 1.447<br>[0.54]  | 1.426<br>[0.67]              | 1.452            | 1.470<br>[0.48]              |
| C4-C <sub>4</sub> (N) |                 |                 |                 |                 | 1.422<br>[0.26]  | 1.414<br>[0.34]              |                  |                              |
| C <sub>4</sub> (N)-N  |                 |                 |                 |                 | 1.163<br>[0.85]  | 1.166<br>[0.91]              |                  |                              |
| C4-C8                 |                 |                 | 1.408<br>[0.56] | 1.391<br>[0.67] |                  |                              | 1.416            | 1.397<br>[0.65]              |
| C5-C11                |                 |                 | 1.408<br>[0.56] | 1.404<br>[0.63] |                  |                              | 1.412            | 1.408<br>[0.58]              |
| C5-C <sub>5</sub> (N) |                 |                 |                 |                 | 1.421<br>[0.25]  | 1.421<br>[0.30]              |                  |                              |
| C <sub>5</sub> (N)-N  |                 |                 |                 |                 | 1.163<br>[0.86]  | 1.165<br>[0.92]              |                  |                              |
| C6-C7                 | 1.416<br>[0.62] | 1.418<br>[0.64] | 1.442<br>[0.44] | 1.419<br>[0.62] | 1.438<br>[0.57]  | 1.436<br>[0.59]              | 1.471            | 1.440<br>[0.56]              |
| C6-C <sub>6</sub> (N) |                 |                 |                 |                 | 1.430<br>[0.26]  | 1.431<br>[0.30]              | 1.430            | 1.430<br>[0.29]              |
| C <sub>6</sub> (N)-N  |                 |                 |                 |                 | 1.163<br>[0.87]  | 1.163<br>[0.92]              | 1.163            | 1.163<br>[0.90]              |

Supplementary Material (ESI) for New Journal of Chemistry  
 This journal is (c) The Royal Society of Chemistry and  
 The Centre National de la Recherche Scientifique, 2007

| <b>bond/atom</b>        | <b>1a</b> | <b>1a<sup>-</sup></b> | <b>2a</b>       | <b>2a<sup>-</sup></b> | <b>1a<sub>CN</sub></b> | <b>1a<sub>CN</sub><sup>-</sup></b> | <b>2a<sub>CN</sub></b> | <b>2a<sub>CN</sub><sup>-</sup></b> |
|-------------------------|-----------|-----------------------|-----------------|-----------------------|------------------------|------------------------------------|------------------------|------------------------------------|
| C7-C15                  |           |                       | 1.393<br>[0.76] | 1.414<br>[0.66]       |                        |                                    | 1.408                  | 1.428<br>[0.60]                    |
| C7-C <sub>7</sub> (N)   |           |                       |                 |                       | 1.430<br>[0.29]        | 1.431<br>[0.31]                    | 1.429                  | 1.432<br>[0.30]                    |
| C <sub>7</sub> (N)-N    |           |                       |                 |                       | 1.163<br>[0.91]        | 1.164<br>[0.92]                    | 1.163                  | 1.164<br>[0.92]                    |
| C8-C9                   |           |                       | 1.386<br>[0.69] | 1.404<br>[0.63]       |                        |                                    | 1.409                  | 1.426<br>[0.55]                    |
| C8-C <sub>8</sub> (N)   |           |                       |                 |                       |                        |                                    | 1.430                  | 1.432<br>[0.28]                    |
| C <sub>8</sub> (N)-N    |           |                       |                 |                       |                        |                                    | 1.163                  | 1.162<br>[0.90]                    |
| C9-C10                  |           |                       | 1.413<br>[0.58] | 1.401<br>[0.65]       |                        |                                    | 1.422                  | 1.409<br>[0.61]                    |
| C9-C <sub>9</sub> (N)   |           |                       |                 |                       |                        |                                    | 1.430                  | 1.428<br>[0.30]                    |
| C <sub>9</sub> (N)-N    |           |                       |                 |                       |                        |                                    | 1.162                  | 1.164<br>[0.92]                    |
| C10-C11                 |           |                       |                 | 1.399<br>[0.66]       |                        |                                    | 1.406                  | 1.414<br>[0.58]                    |
| C10-C <sub>10</sub> (N) |           |                       | 1.386<br>[0.69] |                       |                        |                                    | 1.430                  | 1.432<br>[0.29]                    |
| C <sub>10</sub> (N)-N   |           |                       |                 |                       |                        |                                    | 1.162                  | 1.163<br>[0.93]                    |
| C11-C <sub>11</sub> (N) |           |                       |                 |                       |                        |                                    | 1.429                  | 1.429<br>[0.30]                    |
| C <sub>11</sub> (N)-N   |           |                       |                 |                       |                        |                                    | 1.163                  | 1.163<br>[0.92]                    |
| C12-C13                 |           |                       | 1.448<br>[0.43] | 1.409<br>[0.74]       |                        |                                    | 1.473                  | 1.430<br>[0.64]                    |
| C12-C <sub>12</sub> (N) |           |                       |                 |                       |                        |                                    | 1.423                  | 1.421<br>[0.30]                    |
| C <sub>12</sub> (N)-N   |           |                       |                 |                       |                        |                                    | 1.163                  | 1.164<br>[0.92]                    |
| C13-C14                 |           |                       | 1.391<br>[0.64] | 1.451<br>[0.47]       |                        |                                    | 1.389                  | 1.443<br>[0.46]                    |
| C13-C <sub>13</sub> (N) |           |                       |                 |                       |                        |                                    | 1.421                  | 1.416<br>[0.33]                    |
| C <sub>13</sub> (N)-N   |           |                       |                 |                       |                        |                                    | 1.163                  | 1.166<br>[0.91]                    |
| C14-C15                 |           |                       | 1.418<br>[0.41] | 1.407<br>[0.61]       |                        |                                    | 1.422                  | 1.405<br>[0.58]                    |
| C15-C <sub>15</sub> (N) |           |                       |                 |                       |                        |                                    | 1.429                  | 1.432<br>[0.29]                    |
| C <sub>15</sub> (N)-N   |           |                       |                 |                       |                        |                                    | 1.163                  | 1.163<br>[0.93]                    |

Supplementary Material (ESI) for New Journal of Chemistry  
 This journal is (c) The Royal Society of Chemistry and  
 The Centre National de la Recherche Scientifique, 2007

| <b>bond/atom</b>    | <b>1a</b> | <b>1a<sup>-</sup></b> | <b>2a</b> | <b>2a<sup>-</sup></b> | <b>1a<sub>CN</sub></b> | <b>1a<sub>CN</sub><sup>-</sup></b> | <b>2a<sub>CN</sub></b> | <b>2a<sub>CN</sub><sup>-</sup></b> |
|---------------------|-----------|-----------------------|-----------|-----------------------|------------------------|------------------------------------|------------------------|------------------------------------|
| C1                  | 0.97      | 1.17                  | 0.97      | 1.19                  | 0.95                   | 1.12                               |                        | 1.15                               |
| C2                  | 1.06      | 1.05                  | 1.03      | 1.00                  | 1.08                   | 1.03                               |                        | 0.98                               |
| C3                  | 0.93      | 0.98                  | 0.93      | 1.00                  | 0.91                   | 0.95                               |                        | 0.98                               |
| C4                  | 1.01      | 1.19                  | 0.98      | 1.01                  | 0.99                   | 1.14                               |                        | 0.99                               |
| C <sub>4</sub> (N)  |           |                       |           |                       | 0.93                   | 0.89                               |                        |                                    |
| N <sub>4</sub>      |           |                       |           |                       | 1.05                   | 1.13                               |                        |                                    |
| C5                  | 0.97      | 0.99                  | 0.95      | 0.91                  | 0.95                   | 0.95                               |                        | 0.89                               |
| C <sub>5</sub> (N)  |           |                       |           |                       | 0.93                   | 0.91                               |                        |                                    |
| N <sub>5</sub>      |           |                       |           |                       | 1.04                   | 1.07                               |                        |                                    |
| C6                  | 1.03      | 1.04                  | 1.04      | 1.04                  | 1.02                   | 1.01                               |                        | 1.02                               |
| C <sub>6</sub> (N)  |           |                       |           |                       | 0.92                   | 0.90                               |                        | 0.91                               |
| N <sub>6</sub>      |           |                       |           |                       | 1.06                   | 1.08                               |                        | 1.08                               |
| C7                  | 0.97      | 1.04                  | 0.97      | 1.09                  | 0.95                   | 1.05                               |                        | 1.05                               |
| C <sub>7</sub> (N)  |           |                       |           |                       | 0.93                   | 0.90                               |                        | 0.90                               |
| N <sub>7</sub>      |           |                       |           |                       | 1.03                   | 1.09                               |                        | 1.09                               |
| C8                  |           |                       | 0.97      | 1.00                  |                        |                                    |                        | 0.98                               |
| C <sub>8</sub> (N)  |           |                       |           |                       |                        |                                    |                        | 0.92                               |
| N <sub>8</sub>      |           |                       |           |                       |                        |                                    |                        | 1.06                               |
| C9                  |           |                       | 0.99      | 1.10                  |                        |                                    |                        | 1.06                               |
| C <sub>9</sub> (N)  |           |                       |           |                       |                        |                                    |                        | 0.90                               |
| N <sub>9</sub>      |           |                       |           |                       |                        |                                    |                        | 1.09                               |
| C10                 |           |                       | 0.97      | 1.01                  |                        |                                    |                        | 0.97                               |
| C <sub>10</sub> (N) |           |                       |           |                       |                        |                                    |                        | 0.91                               |
| N <sub>10</sub>     |           |                       |           |                       |                        |                                    |                        | 1.06                               |
| C11                 |           |                       | 0.99      | 1.07                  |                        |                                    |                        | 1.05                               |
| C <sub>11</sub> (N) |           |                       |           |                       |                        |                                    |                        | 0.91                               |
| N <sub>11</sub>     |           |                       |           |                       |                        |                                    |                        | 1.08                               |
| C12                 |           |                       | 0.99      | 1.00                  |                        |                                    |                        | 0.96                               |
| C <sub>12</sub> (N) |           |                       |           |                       |                        |                                    |                        | 0.91                               |
| N <sub>12</sub>     |           |                       |           |                       |                        |                                    |                        | 1.06                               |
| C13                 |           |                       | 1.02      | 1.20                  |                        |                                    |                        | 1.14                               |
| C <sub>13</sub> (N) |           |                       |           |                       |                        |                                    |                        | 0.89                               |
| N <sub>13</sub>     |           |                       |           |                       |                        |                                    |                        | 1.13                               |
| C14                 |           |                       | 0.94      | 1.00                  |                        |                                    |                        | 0.97                               |
| C15                 |           |                       | 1.02      | 1.02                  |                        |                                    |                        | 0.99                               |
| C <sub>15</sub> (N) |           |                       |           |                       |                        |                                    |                        | 0.91                               |
| N <sub>15</sub>     |           |                       |           |                       |                        |                                    |                        | 1.06                               |

<sup>a</sup> obtained by the B3LYP/6-31G(d) method

<sup>b</sup> obtained by the HF/6-31G(d)//B3LYP/6-31G(d) method
